**Title:** Genome-wide characterization of isoform switching in *Arabidopsis thaliana*

**Running title:** Isoform switching in *Arabidopsis thaliana*

**Keywords:**

alternative splicing, isoform switching, *Arabidopsis thaliana*, RNA-Seq, transcriptomics

**Authors' full names:**

Dries Vaneechoutte<sup>1</sup>, April R. Estrada<sup>2</sup>, Ying-Chen Lin<sup>2</sup>, Ann E. Loraine<sup>2</sup>, and Klaas Vandepoele<sup>1\*</sup>

**Institution addresses:**

<sup>1</sup> Department of Plant Systems Biology, VIB, Technologiepark 927, B-9052 Gent, Belgium (D.V., K.V.), Department of Plant Biotechnology and Bioinformatics, Ghent University, Technologiepark 927, B-9052 Gent, Belgium (D.V., K.V.)

<sup>2</sup> Department of Bioinformatics and Genomics, University of North Carolina at Charlotte, North Carolina Research Campus, Kannapolis, NC 28081, USA (A.R.E, Y.C.L., A.E.L)

**Corresponding author:**

Klaas Vandepoele: [klaas.vandepoele@psb.vib-ugent.be](mailto:klaas.vandepoele@psb.vib-ugent.be)  
Department of Plant Systems Biology, VIB - Universiteit Gent  
Technologiepark 927, B 9052 Ghent (Belgium)  
Tel. 32 9 3313822 - Fax 32 9 3313809

**E-mail addresses:**

Dries Vaneechoutte: [dries.vaneechoutte@psb.vib-ugent.be](mailto:dries.vaneechoutte@psb.vib-ugent.be)  
April R. Estrada: [April.Roberts@uncc.edu](mailto:April.Roberts@uncc.edu)  
Ying-Chen Lin: [ylin15@ncsu.edu](mailto:ylin15@ncsu.edu)  
Ann E. Loraine: [Ann.Loraine@uncc.edu](mailto:Ann.Loraine@uncc.edu)  
Klaas Vandepoele: [klaas.vandepoele@psb.vib-ugent.be](mailto:klaas.vandepoele@psb.vib-ugent.be)

**Word counts:**

Total (7977) - Summary (246) - Introduction (902) - Results and Discussion (4293) - Experimental procedures (1942) - Figure legends (594) - References (1638)

## SUMMARY

Alternative splicing and the usage of alternate transcription start- or stop sites allows a single gene to produce multiple transcript isoforms. Most plant genes express one isoform at a significantly higher level than others, but under specific conditions this expression dominance can switch to different isoforms. These isoform switches have been observed for thousands of *Zea mays* and *Vitis vinifera* genes and have been linked to development and stress response. In *Arabidopsis thaliana* however, isoform switches have only been reported for 812 genes and the characteristics of these genes, nor the implications of the isoform switches on their protein functions, are currently well understood. Here we present a dataset of isoform dominance and switching for all genes in the AtRTD2 annotation based on a protocol that was benchmarked on simulated data and validated through comparison with a published RT-PCR panel. We report 138,722 isoform switches for 8,162 genes across 206 public RNA-Seq samples and find that these switches change the protein sequences in 23% of the cases. The observed isoform switches show high consistency across replicates and reveal reproducible patterns in response to treatment and development. We also demonstrate that genes with different ages, expression breadths, and functions show large differences in the frequency at which they switch isoforms and in the effect that these isoform switches have on their protein sequences. Finally, we showcase how the detected isoform switches can be applied to gain further insight in the regulation of a gene's expression and function.

## SIGNIFICANCE STATEMENT

Isoform switching through alternative splicing has been reported for thousands of genes in plants, yet genome-wide datasets to study the implications for gene functions are thus far not available. Here we present the first reference dataset of isoform dominance and switching for *Arabidopsis thaliana* based on 206 public RNA-Seq samples and provide novel insights in the regulation and functional consequences of alternative splicing.

## INTRODUCTION

When and where a gene is transcribed in a eukaryotic cell is governed by a complex system of regulatory elements. Trans-acting transcription factors regulate transcription by binding to cis-regulatory elements on the DNA and by recruiting the transcriptional machinery, including the RNA polymerase enzyme (Hobert, 2008). Access to these cis-regulatory elements depends on the chromatin structure, which is in turn regulated by histone modifications and DNA methylation (Li, 2002). After transcription is initiated, the usage of alternative transcription start- and stop sites and co-transcriptional alternative splicing (AS) of the precursor RNA allow for an assortment of different transcripts, from here on referred to as isoforms, to be created from a single gene. AS is regulated by trans-acting splice factors, such as serine/arginine-rich proteins and heterogeneous nuclear ribonucleoproteins, that bind to splice sequences at the intron-exon border or to splicing enhancer- or silencer sequences within introns or exons (Perteau et al., 2007; Erkelenz et al., 2013). Four major types of alternative splice events exist that can change the mRNA content: (i) exon skipping, which is the most frequent in vertebrates and invertebrates (Kim et al., 2007), (ii) intron retention, which is the most frequent in plants (Wang and Brendel, 2006; Marquez et al., 2012; Chamala et al., 2015), (iii) alternative splice donor site, and (iv) alternative splice acceptor site. In plants, the majority of splice junctions are located in the protein coding sequences (CDS) of genes (Marquez et al., 2012). Alternative splicing in these junctions can introduce premature termination codons (PTC), which can change the transcript's

susceptibility to nonsense mediated decay (NMD). It is estimated that NMD is the fate of alternative transcripts for 13% of *Arabidopsis* multi-exon genes, but it is currently not well understood in which cases these transcripts are effectively degraded (Kalyna et al., 2012). Isoforms that are not degraded by NMD can get translated into proteins with altered (related, distinct, or opposing) functions and/or changes in subcellular localization, stability, enzymatic activity, binding or posttranslational modifications (Carvalho et al., 2013; Kelemen et al., 2013). Alternative splice events that change the transcript's untranslated regions can impact mRNA stability or translational efficiency (Hughes, 2006; Kalyna et al., 2012).

In humans, it is estimated that 95% of multi-exon genes undergo alternative splicing and that there are on average at least seven alternative splice events per gene (Pan et al., 2008). Human protein-coding genes often have a dominant isoform, which is expressed at a significantly higher level than others (Gonzalez-Porta et al., 2013). Under certain conditions genes can drastically change the relative expression levels of their isoforms, which is defined as isoform switching (Trapnell et al., 2010; Gonzalez-Porta et al., 2013). For plants, alternative splice events have been found for 40-70% of multi-exon genes in nine angiosperms (Chamala et al., 2015). Isoform dominance and switching has also been observed in several plant species. In *Vitis vinifera* (grapevine), 4,069 genes were found to exhibit at least one isoform switch across 124 samples from different tissues, stress treatments, and genotypes (Vitulo et al., 2014). In *Zea mays* (maize), 1,204

and 3,064 genes with isoform switches were observed over the course of development and under drought stress treatment respectively, in a study covering 94 samples (Thatcher et al., 2016). In *Arabidopsis thaliana* however, only 812 genes in the TAIR10 annotation (Lamesch et al., 2012) have so far been reported to switch isoforms across 61 samples (Sun et al., 2014). Stress and development have been shown to impact regulation of alternative splicing in *Arabidopsis thaliana* (Reddy et al., 2013; Staiger and Brown, 2013; Filichkin et al., 2015), but the effects on isoform switching have not yet been studied on a genome-wide scale. It is for example not known what proportion of alternatively spliced genes or which types of genes undergo isoform switching, in what respect isoform switching is influenced by treatments or developmental stages, or what the implications are for the protein coding sequences. Given the recently uncovered prevalence of alternative splicing, and because unknown isoform switches can confound gene-level experimental procedures, such as expression quantification or the creation of overexpressor lines, there is an increasing need for a dataset or platform to look up the isoform switching behavior of genes of interest.

Here we present a large scale dataset containing isoform expression levels, isoform dominance calls, and isoform switching calls for *Arabidopsis thaliana* across 206 public RNA-Seq experiments, covering different combinations of stress and hormone treatments and a wide array of vegetative and reproductive tissues. For this, the new AtRTD2 annotation was used (Zhang et al., 2017), which provides the most extensive and accurate collection of transcripts for *Arabidopsis*

*thaliana* to date and consists of a merge between annotations from TAIR10 (Lamesch et al., 2012), Araport11 (Cheng et al., 2016), AtRTD (Zhang et al., 2015), and a new transcript assembly based on 129 RNA-Seq libraries (Zhang et al., 2017). Based on the generated dataset, we provide a genome-wide overview of isoform switching in relation to gene function by integrating sample metadata, Gene Ontology annotations, and protein domain analysis. We show that the frequency at which genes switch isoforms and the effect of these isoform switches on the protein sequences differ substantially between genes of different ages, functions, structure, and expression breath. Finally, we showcase how the detected isoform switches can be used to gain further insight in the function and regulation of alternative splicing for specific genes of interest or to find novel candidates for functional analysis.

## RESULTS AND DISCUSSION

### **Benchmarking the detection of isoform dominance and switching shows best performance for an Ensemble method**

Before quantifying isoform expression levels using public datasets from the Sequence Read Archive (SRA), the detection of isoform dominance and switching was benchmarked on simulated RNA-Seq datasets. These were generated with the Flux simulator (Griebel et al., 2012), which takes as input the number of RNA molecules (molecule count) to simulate for each isoform and can simulate single- or paired-end reads of different lengths. A compendium of 100 simulated samples was generated, containing molecule counts for all isoforms in the AtRTD2-QUASI *Arabidopsis thaliana* annotation (Zhang et al., 2017). AtRTD2-QUASI is a modified version of AtRTD2 that has been optimized for isoform expression quantification (Zhang et al., 2017). Every isoform from genes with two or more annotated isoforms was simulated as dominant in exactly 20 of the samples by assigning it a five times higher molecule count than the non-dominant isoforms on the same gene (see Experimental Procedures). Flux was then used to simulate single- and paired-end RNA-Seq reads of different lengths for each of the 100 virtual samples. The resulting RNA-Seq datasets were processed with three popular expression quantification tools: Kallisto (Bray et al., 2016) and Salmon (Patro et al., 2015), which are alignment-free methods, and Cufflinks (version 2) (Trapnell et al., 2010), which requires reads aligned to the genome as input. Simulated reads were first



aligned to the TAIR10 reference genome using STAR (Dobin et al., 2013), which was chosen for its speed and accuracy (Engstrom et al., 2013).

For each simulated RNA-Seq dataset, Cufflinks produced Fragments Per Kilobase of transcript per Million mapped reads (FPKM) values (Mortazavi et al., 2008) whereas Kallisto and Salmon produced Transcripts Per Million (TPM) values (Li et al., 2010). Both FPKM and TPM values are from here on referred to as PM expression values. Isoform dominance was called with each tool individually by setting a threshold on the ratio of an isoform's PM over the median PM of the gene's other isoforms in an iterative manner, which provides robustness of detection for genes with a large number of isoforms (see Experimental Procedures). This method allows multiple isoforms per gene to be called as dominant in the same sample. An Ensemble method was also implemented which calls an isoform as dominant when at least two out of the three individual tools confirm the dominance. Isoform switches were called by first selecting the most common configuration of dominant isoforms for each gene across the 100 simulated samples. Any deviation from this configuration (loss or gain of dominance by one or more isoforms) was called as an isoform switch except when no dominant isoforms were detected (see Experimental Procedures).

Detection of dominant isoforms was evaluated by calculating recall, precision and F1 scores (the harmonic mean of recall and precision) for each isoform individually by counting the number of correct dominance calls across the 100 simulated samples. The same measures were calculated for each gene individually to

evaluate isoform switching calls. Performance was assessed for each tool separately and for the Ensemble method by plotting the F1 scores in boxplots along with average recall and precision scores (Figure 1). RNA-Seq datasets with different read length (50nt, 75nt, and 100nt), read type (single-end, paired-end), and read numbers (10, 20, 30, 40, and 50 million reads) were examined to test the robustness of the detection method (Figure 1). These ranges of read numbers and read lengths were chosen to reflect the properties of public RNA-Seq datasets (Supplemental Figure S1).

Downsampling the read number showed that performance decreased as the number of reads dropped, but that even with 10 million reads the tools still performed well with the Ensemble method achieving average F1 scores of 80.83% and 87.57% for isoform dominance and isoform switch detection respectively (Figure 1). Longer reads improved results, likely due to the increased chance for each read to span a discriminative exon-exon junction. Each of the tools showed higher F1 scores for 20 million reads of 100bp compared to 40 million reads of 50bp even though the total number of sequenced nucleotides in both datasets was equal. This indicates that read length is more important than the number of reads for accurate isoform abundance estimation. To test the effect of paired-end sequencing, results for 30 million single-end reads of 100nt were compared to 15 million paired-end read pairs of 2x100nt. The total number of sequenced nucleotides is again equal in both datasets, yet the use of paired-end reads

improved average F1 scores of the Ensemble method from 94.24% to 95.72% for isoform switch detection.

Of the three individual tools, Kallisto achieved the highest precision, recall and F1 scores for each simulated dataset. Combining the three tools in the Ensemble method yielded the best performance overall, with F1 scores for dominant isoform detection averaging 90.31% for 50 million 100nt reads. Therefore the ensemble method was chosen to detect isoform dominance and switching in public datasets.

### **The number of isoforms per gene and their physical overlap affects dominant isoform detection performance**

Over the past few years, the number of known isoforms in the *Arabidopsis thaliana* transcriptome has increased drastically. In November 2010, the TAIR10 annotation contained 27,416 protein coding genes of which 21% had more than one known isoform (on average 2.37 isoforms per gene) (Lamesch et al., 2012). In 2016, two new annotations were released: Araport11 in which 41% of 27,655 protein-coding genes had more than one isoform with on average 2.94 isoforms per gene (Krishnakumar et al., 2015), and AtRTD2 in which 49% of 27,667 protein-coding genes (60% of 22,453 intron-containing) had more than one isoform with on average 4.44 isoforms per gene (Zhang et al., 2017). However, the large number of isoforms per gene in AtRTD2 potentially complicates expression quantification. To investigate if this affected the detection of isoform dominance and switching, genes were first binned based on their number of transcripts. Next, the average F1

scores of their transcripts (obtained with the Ensemble method) were plotted in Figure 2. As the number of transcripts increased, the F1 scores decreased as expected yet the curve showed two unexpected properties. First, the curve exhibited a stepwise decline where the F1 scores decreased more when incrementing the number of isoforms from an odd to an even number than vice versa. Second, F1 scores appeared better for genes with three isoforms than for genes with only two isoforms, which argues against the assumption that isoform abundance estimation is more complex for genes with more isoforms. The stepwise decline of F1 scores can be explained by the way dominant isoforms were defined and simulated. If we consider the calling of dominant isoforms as a classification problem then  $N$  isoforms need to be classified in a set of dominant and a set of non-dominant isoforms. Since we stated that no more than half a gene's isoforms could be simulated as dominant in a single sample, the maximum number of dominant isoforms is  $N/2$ . This number only changes when incrementing  $N$  from an odd to an even number, which could explain the uneven decline of F1 scores.

To explain the higher F1 scores for genes with three isoforms compared to genes with only two, we defined the Discriminative Mapping Area (DMA) of a gene as the union of the genomic areas that are only present in a subset of its isoforms (Figure 2). RNA-Seq reads that align to a gene's DMA can be used by the expression quantification tools to estimate relative abundances between isoforms and so a longer DMA should benefit isoform expression quantification and subsequent

dominant isoform detection. To verify this, a Spearman's rank correlation was calculated between a gene's DMA per isoform (the DMA length in nucleotides divided by its number of isoforms) and the average F1 score of the gene's isoforms. A significant positive correlation was found ( $r_s=0.26$ ,  $p<0.001$ ) and this correlation increased to  $r_s=0.35$  and  $r_s=0.42$  when only genes with fewer than five and four isoforms were considered respectively. The DMA per isoforms peaks for genes with three isoforms and is rather low for genes with two isoforms, which offers an explanation for the difference in F1 scores (Figure 2). Overall, our results indicate that the performance of isoform switch detection decreases when more isoforms are annotated due to a decrease in DMA length per isoform. However, even for genes with ten isoforms the average F1 score remains high at 83.28%, which demonstrates the robustness of the ensemble method against this decline in DMA lengths.

### **Construction and validation of a large-scale isoform dominance and isoform switching compendium**

To generate a large-scale compendium of isoform dominance and isoform switching calls for *Arabidopsis thaliana*, publicly available RNA-Seq datasets from SRA were first manually curated (see Experimental Procedures). This resulted in a set of 121 samples covering 43 different combinations of treatments and organs (Supplemental Table S1). A recent RNA-Seq library containing 85 samples for 79 organs and developmental stages, as well as time-series for heat, cold, and

wounding stresses was also included (Klepikova et al., 2016). Raw RNA-Seq data for all 206 samples were processed to obtain FPKM and TPM values from Cufflinks, Salmon, and Kallisto (Supplemental Data S1), and isoform dominance and switching was detected using the Ensemble method (Supplemental Data S2 and S3).

To evaluate if the performance of dominant isoform detection for the public RNA-Seq datasets was in line with the performance observed for simulated datasets, the isoform dominance calls for the public RNA-Seq samples were compared to a high-resolution reverse transcription polymerase chain reaction (HR RT-PCR) panel (Simpson et al., 2008), which has previously been used to validate alternative splice events (Marquez et al., 2012; Zhang et al., 2015). This study reports Percent Spliced (PS) values for 34 genes in *Arabidopsis* root, flower, and light- or dark grown seedling. These PS values indicate the relative abundance of transcripts containing either a proximal or distal splice event (Supplemental Table S2). To make these PS values comparable to the categorical output of the dominant isoform detection, the following approach was used: First, to complement the organs examined in the Simpson et al. study, untreated public RNA-Seq samples were selected for root (14 samples), leaf (37 samples), and flower (20 samples) (Supplemental Table S1). Next, for each gene the percentage of samples in which isoforms with either the proximal or distal splice event were detected as dominant was determined per organ. These Percent Samples (PSam) values were then used as a proxy to compare to the PS values from Simpson et al. Figure 3

shows the side-by-side comparison between the qPCR PS and the RNA-Seq PSam values for 20 genes that have available PS values for the relevant organs in Simpson et al. and for which the reported proximal and distal splice events were annotated in AtRTD2. A strong positive correlation was found (Pearson's  $r = 0.84$ ,  $p < 0.001$ ), which confirmed the correctness of the isoform dominance calls on public RNA-Seq datasets.

### **Hierarchical clustering of public RNA-Seq samples shows consistent patterns of treatment- and organ-specific isoform switching**

To provide an overview of the samples in the compendium, and to examine the robustness of the isoform switching calls across replicates, a hierarchical clustering of the samples was performed based on the switching calls (Figure 4) (see Experimental Procedures). Apart from five exceptions (samples 21, 32, 54, 80, and 81), the remaining 133 replicate samples (connected by red lines in Figure 4) clustered closely together, which demonstrated a high consistency of the switching calls. Samples 1- 14 formed a cluster of root samples from three separate studies. Even though these samples clustered together based on the organ they were extracted from, the hormone treatments (auxin for samples 3-4 and brassinosteroid for samples 5-6) nor the iron deficiency treatment (samples 12-14) appeared to have a noticeable effect on the detected isoform switches. On the other hand, dormant seed samples from the same study were separated in clustering based on the temperature at which the seeds matured (20°C for samples

15-17 and 15°C for samples 18-20), which demonstrated an effect of the maturation temperatures on isoform switching. Other examples of treatments that affected isoform switches were exposure to ozone (samples 51-53 compared to control samples 48-50), drought stress (samples 61-62 compared to control samples 59-60), and the heat-, wound-, and cold stress treatments in the Klepikova et al. samples (samples 191-195, 196-201, and 202-206 respectively). Samples from five separate studies of biotic stress (*B. cinerea* and *P. syringae* infection) on leaves clustered in two groups (samples 21-25 and 90-95), which indicated reproducible isoform switches in response to these treatments as well. Most samples from the Klepikova et al. study formed one large cluster, separate from other samples from similar tissues and treatments, revealing the presence of a laboratory bias in the observed isoform switches. Within the Klepikova et al. study, samples from similar organs clustered together except for samples 182-190. These formed a heterogeneous cluster of organs and tissues, yet they were all from senescent or mature organs, which could explain the similarity of isoform switching in these samples. Overall, the tight clustering of replicates and the separation of samples from different organs and treatments revealed the presence of reproducible isoform switching patterns related to development and in response to stimuli.



## **Isoform switches occur in genes across a wide functional landscape and frequently alter protein sequences and domains**

The bar charts in Figure 4 present the number of genes that undergo isoform switching in each sample. Isoform switches were divided into four classes based on their effect on the protein coding sequences (CDSs) and the protein domain contents of the final gene products (see Experimental Procedures): (i) isoform switches that did not affect the CDSs (non-CDS altering), (ii) isoform switches from or to a configuration where none of the dominant isoforms were annotated with a valid CDS (CDS toggling), (iii) switches that altered CDSs without changing their protein domain content (CDS altering), and (iv) switches that altered the CDSs and also changed their protein domain content (domain altering). The CDS data were obtained from AtRTD2 and are the result of an algorithm that fixes the translation start site AUG at the same position for each isoform rather than searching for the longest open reading frames (Zhang et al., 2017). This avoids the erroneous assumption that translation can start at a downstream AUG if the authentic one leads to a PTC (Brown et al., 2015). Isoforms with a CDS shorter than 300 nucleotides were not considered to be protein coding since these transcripts are likely targeted by NMD (Kalyna et al., 2012). Isoforms that were the result of an intron retention event were also not considered to be protein coding since this type of splice event can cause transcripts to be retained inside the nucleus, which prevents translation (Gohring et al., 2014; Brown et al., 2015).

In total, 138,722 isoform switches were observed for 8,162 genes. On average per sample, 673 genes underwent isoform switches, which resulted in CDS- and domain altering switches in 16% and 7% of the cases respectively. In 30% of the cases, a toggle switch was observed. These can result from a switch to or from isoforms with unknown CDSs, a premature termination codon which makes them potential targets of NMD, or an intron retention event. Of all isoform observed isoform switches, 48% involved the gain or loss of dominance of at least one isoform with an intron retention event, the most common type of alternative splice events (Chamala et al., 2015). The largest number of isoform switches were found in samples 107-111, which are samples of whole seedlings placed under severe abiotic stresses to study alternative splicing in *Arabidopsis* (Filichkin et al., 2015). In total 8,162 genes with two or more isoforms in AtRTD2 were found to undergo isoform switching across all 206 samples. This is a tenfold increase compared to the 812 genes that were previously reported to switch isoforms in a dataset of 61 samples (Sun et al., 2014). The full data set of isoform switches together with detailed sample metadata is available in Supplemental Data S3 and Supplemental Table S1.

### **Genes with frequent, rare, or no isoform switching differ in age and function**

Counting how frequently each gene underwent isoform switches revealed that the majority of genes switch isoforms at least once (Figure 5). Out of the 14,916 genes with two or more isoforms in AtRTD2-QUASI, excluding 1,331 genes with

expression in less than five samples, 5,423 genes did not show isoform switches in any of the 206 samples (non-switchers), 5,137 genes showed isoform switches in less than 10% of the samples they were expressed in (rare switchers), and 3,025 genes showed isoform switches in 10% or more of the samples they were expressed in (frequent switchers). To examine if the occurrence of isoform switches can be linked to gene functions or to the evolutionary age of the genes, gene set enrichment analyses were performed on the non-, rare-, and frequent switchers (Figure 5) (Supplemental Table S3). For Gene Ontology (GO) terms, enrichments were calculated for each term in the GO slim annotation, including annotations for all evidence types (Gene Ontology, 2015). For the gene age analysis, each gene was assigned to one of five phylostrata: Viridiplantae, Embryophyta, Angiosperms, Eudicots, and Brassicaceae. Phylostrata describe for each gene the lowest common ancestor of the species that contain a homolog of the gene (Proost et al., 2015) (see Experimental Procedures).

A selection of GO terms that were significantly enriched (based on a hypergeometric test with Benjamini-Hochberg correction at FDR=0.05, see Experimental Procedures) are shown in panel B of Figure 5. Non-switchers were most noticeably enriched for translation, secondary metabolism, ribosomal and cell wall components, structural molecules, and oxygen binding. All of these terms were strongly depleted in the frequent switchers. Rare switchers showed enrichment for translation factors, lipid metabolism, and multicellular development. Frequent switchers were enriched for DNA binding and nuclease- and kinase

activity. Overall, these results suggest that genes without isoform switches are more often involved in housekeeping functions, whereas genes that switch frequently more often take on regulatory functions. Enrichment analyses using phylostrata information showed that the oldest genes, conserved within Viridiplantae, are depleted for non-switchers and enriched for rare switchers, whereas younger genes showed the opposite trend. Frequent switchers were found to be enriched for young Brassicaceae-specific genes, whereas rare switchers were depleted for these genes.

### **CDS altering isoform switches occur disproportionately across genes with varying properties**

To examine if genes with different characteristics exhibit different splicing behavior, genes were first grouped in five categories: (i) genes that underwent no isoform switches, and genes that underwent at least one (ii) non-CDS altering switch, (iii) CDS toggling switch, (iv) CDS altering switch, or (v) domain altering switch. Each gene was only placed in the most specific applicable category. Next, genes were binned based on a series of properties: (i) the frequency at which they switch isoforms, (ii) the number of annotated isoforms, (iii) the number of exons, (iv) the expression breadth as the number of samples the gene was expressed in, (v) the number of Protein-Protein Interaction (PPI) partners, (vi) the phylostratum of the gene, and (vii) the number of paralogs the gene has in *Arabidopsis thaliana* (see Experimental Procedures) (Figure 6). Genes with frequent isoform switches were

mostly found to undergo CDS toggling switches, whereas rare switchers more often showed CDS- and domain altering switches, indicating that genes that alter their coding sequences tend to do so sparingly. When comparing genes with a different number of annotated isoforms, genes with only two isoforms were less often found to undergo isoform switching compared to genes with more than two isoforms. Similarly, genes with more exons were more often found to undergo isoform switches, and a larger portion of these genes showed domain altering switches. Possibly, both a larger number of isoforms and exons per gene simply increases the number of opportunities for an alternative splice site to occur, which could explain these trends. For the expression breadth it was found that genes with expression in most but not all samples showed the highest proportion of genes with isoform switches. Reversely, genes with more specific expression in less than 20 samples showed less isoform switching. Genes expressed throughout the compendium also showed less isoform switching, which concurred with the previous observation that genes with housekeeping functions, which are typically expressed constitutively, were enriched in the non-switchers. A strong difference in the categories of isoform switching was found for genes of different phylostrata. The younger Brassicaceae- and Eudicot-specific genes showed very few CDS- or domain altering and more CDS toggling switches compared to older genes. The largest number of CDS and domain altering switches was found for the oldest genes, conserved throughout Viridiplantae. These results suggest that in younger genes alternative splicing is used as a regulatory mechanism to modulate the level of protein production, whereas in older genes it more often directly affects the

functions of the proteins by altering their sequences. Future work will be needed to determine if these alterations to the coding sequences are themselves conserved, or if each plant species can produce their own set of new proteins out of old genes. Finally, isoform switching was compared between genes with a different number of paralogs to study the relationship between gene duplication and isoform switching. The relationship between gene duplication and alternative splicing has been studied extensively, but is not fully understood (Iniguez and Hernandez, 2017). Singleton genes in rice were found to produce less alternatively spliced isoforms than genes with paralogs (Lin et al., 2008) but for human genes, the reverse trend was observed (Roux and Robinson-Rechavi, 2011). Our findings show that genes with fewer paralogs are less likely to undergo isoform switching than genes with more paralogs. This result, combined with the results from Lin et al., 2008, suggests that many plant genes that already diversified their transcriptomes through duplication, tend to do so even more through alternative splicing and are more prone to modify their transcriptomes through isoform switching.

### **Case studies showcase the potential of isoform switch detection for gene function analysis**

To demonstrate how the isoform dominance dataset can be used to gain insight in gene function and regulation, three genes with interesting isoform switching patterns were selected for further examination (Figure 7). The first gene was *AGL15* (*AT5G13790*), which is a member of the MADS domain family of

transcription factors. It is known to regulate abscission, senescence, and development of reproductive tissues (Fang and Fernandez, 2002), can induce somatic embryogenesis (Zheng et al., 2016), and regulates genes involved in seed dormancy (Zheng et al., 2009). In the 206 public samples, *AGL15* was primarily expressed in seed samples and in most cases *AT5G13790\_P1* and *AT5G13790\_s1* were detected as the dominant isoforms. In the six dormant seed samples however, an isoform switch event was observed where a third isoform, *AT5G13790\_ID7*, gained dominance (Figure 7). This isoform is the result of an intron retention in the region that codes for a transcription factor K-box domain (IPR002487). This intron retention will likely cause this isoform to be retained inside the nucleus, away from NMD and translation machinery (Gohring et al., 2014; Brown et al., 2015). Although the role of *AGL15* in flower and seed development has been extensively described in literature, the isoform switch to an intron retention in dormant seeds was not yet described.

A second gene that was examined was *UIF1* (*AT4G37180*), which is a member of the GARP2 G2-like subfamily of transcription factors and is known to control floral meristem activities (Moreau et al., 2016). The *AT4G37180\_P1* isoform, which contains a DNA-binding Myb domain, was found to be dominant in most samples. In cold stress samples from two independent studies however, an isoform switch was detected where the *AT4G37180\_s1* isoform gained dominance (Figure 7). This isoform has an elongated fourth exon which shifts the reading frame and introduces a stop codon. This results in a shorter coding sequence with a truncated

Myb domain (Figure 7). A possible consequence of this is that the protein can still bind its interaction partners but will no longer be able to initialize transcription and might thus act as an inhibitor. An analogous process has previously been described for the starch metabolism regulating transcription factor *IDD14* (Seo et al., 2011). *UIF1* has currently not been annotated with any GO terms that suggest a role in stress response, though given its involvement in floral meristem activities, the detected switch event makes it an interesting candidate for further functional analysis regarding its role in cold response.

A third gene with an interesting isoform switching pattern was *KAT5* (*AT5G48880*). It encodes a 3-ketoacyl-CoA thiolase with known involvement in inflorescence meristem development (Wiszniewski et al., 2014). The gene was previously known to undergo alternative splicing, resulting in two versions of the *KAT5* protein: *KAT5.2* which contains a type 2 peroxisomal targeting sequence and is located in the peroxisomes, and *KAT5.1* which lacks the targeting sequence due to an exon skip event and is located in the cytosol (Carrie et al., 2007). Published analyses with *KAT5.1*- and *KAT5.2*-GUS lines reported that *KAT5.1* was active from early stages of flower development but was absent beyond stage 12 of development, whereas *KAT5.2* activity was observed during the middle stages (9-12) (Wiszniewski et al., 2012). Isoform switch detection on the flower development time series samples from the Klepikova et al. study confirmed this pattern as a clear switch was observed from *AT5G48880\_P1* (*KAT5.1*) in young flowers at the



meristem to *AT5G48880\_P4* (KAT5.2) in older flowers near the base of the plant (Figure 7).

Overall, these examples showcase that the isoform switching calls generated in this study can be applied to gain both confirmatory results and novel insights in the function and regulation of alternative splicing in *Arabidopsis thaliana*.

## EXPERIMENTAL PROCEDURES

### Simulation of RNA-Seq data

The compendium of 100 virtual samples was generated by assigning molecule counts to each transcript in the AtRTD2-QUASI annotation of the *Arabidopsis thaliana* genome (Zhang et al., 2017). This was done for each sample individually as follows: first, a molecule count was assigned to each gene by randomly sampling from estimated molecule counts. These estimates were calculated by scaling gene-level raw read counts so that the total sum of molecule counts equaled 5 million. Raw read counts were obtained by processing RNA-Seq data from a random experiment on the Sequence Read Archive (SRX1796284) with Salmon (see Isoform expression quantification). Secondly, the molecule counts were increased by 50 for each gene and multiplied by the number of known transcript isoforms for the gene. This ensured that all transcripts were expressed in the simulation. Thirdly, molecule counts for each gene were distributed among its transcripts so that non-dominant isoforms had an equal number of molecules and dominant isoforms had five times more. Finally, the molecule counts were scaled again so that the total sum of molecules amounted to 5 million per sample. Which isoforms were dominant in which samples was randomly selected so that each transcript was dominant in exactly 20 of the 100 samples and less than half a genes' transcripts were dominant in the same sample.

The Flux simulator (v1.2.1, Flux Library 1.22) (Griebel et al., 2012) was used to simulate FASTQ files with RNA-Seq reads of different type (single-end, paired-end) and length (50nt, 75nt, 100nt) for each of the 100 virtual samples. The default error model for reads of 76 nucleotides was used to simulate sequencing errors. Poly-A tail simulation was disabled as this caused bad performance of expression quantification for paired-end reads. Other parameters were set to default. 60 Million reads were simulated and aligned with STAR (see Isoform expression quantification) for every combination of read type and length. Datasets of 50, 40, 30, 20, and 10 million reads were obtained by random downsampling from the aligned reads. Only primary alignments were kept for the simulated reads.

### **Selection of public RNA-Seq datasets**

SRA was queried on October 1<sup>st</sup> 2015 to obtain all studies which had an experiment that matched following criteria: LIBRARY\_STRATEGY="RNA-Seq", LIBRARY\_SOURCE="TRANSCRIPTOMIC", and STUDY\_TYPE="Transcriptome Analysis". This resulted in 214 studies comprising 2799 experiments. These were manually curated to select samples suited for dominant isoform detection: only experiments on Col-0 plants were considered, experiments performed on mutants or transgenic plants were excluded. Samples with fewer than 15 million reads were discarded. Only experiments with Illumina reads were used. Experiments performed on the same sample were considered to be technical replicates and their reads were merged to obtain a single set of reads per sample. These steps

resulted in a final set of 121 samples for 43 different combinations of treatments and plant tissues (Supplemental Table S1). A recent dataset, containing 85 samples from different organs, developmental stages, and stress treatments was added as well (Klepikova et al., 2016), bringing the total number of samples to 206.

### **Isoform expression quantification**

Reads were aligned to the TAIR10 *Arabidopsis thaliana* reference genome with STAR (v2.4.0j) (Dobin et al., 2013). Expression quantification was performed with Cufflinks (v2.2.1) (Trapnell et al., 2010), Kallisto (v0.43.0) (Bray et al., 2016), and Salmon (v0.6.1) (Patro et al., 2015). For STAR, reads aligning to non-canonical splice junctions not present in known transcripts were removed. The maximum number of multi-mappings per read was set to 15 and reads were allowed to align with 10% mismatches. The maximum overhang on each side of a splice junction was set to 100 and the minimum and maximum intron lengths were set to 5 and 6000 respectively. BAM files needed by Cufflinks were obtained by sorting and converting the SAM files with SAMtools (v1.1) (Li et al., 2009). For the simulations, FASTQ files needed by Kallisto and Salmon were created directly from the SAM file with a custom script. This ensured that all three tools were given the same reads as input.

To process the public RNA-Seq data, SRA files were downloaded from the Sequence Read Archive (Kodama et al., 2012) and converted to the FASTQ format using fastq-dump from the SRA toolkit (v2.4.4). FastQC (v0.11.2) (Andrews, 2010)

was used to detect overrepresented adapter sequences, which were subsequently clipped with `fastx_clipper` from the FASTX toolkit (v0.0.13) (Gordon, 2009). Reads shorter than 20 nucleotides after adapter clipping were discarded. The resulting FASTQ files were used as input for Kallisto and Salmon directly, and not aligned first as was done for the simulated data.

Cufflinks, Kallisto, and Salmon were run with default parameters. The index for Kallisto and Salmon was built with a k-mer length of 19 nucleotides. The `libtype` option for Salmon was set to `"U"` and `"UI"` for single-end and paired-end reads respectively. For Kallisto, the estimated average and standard deviation of the fragment lengths were set to 200 and 20 respectively. Detection of novel transcripts was disabled for Cufflinks.

### **Detection of dominant isoforms**

Dominant isoforms were detected by calculating the ratio of each isoform's PM expression value (FPKM or TPM) over the median PM of other isoforms from the same gene. This ratio-based method differs from the more common percentage-based method, where a threshold is set on a transcripts expression as a percentage of the total expression of the gene. The reason for the new ratio-based method is to allow more than one isoform to be dominant in the same sample. If for example a gene with four isoforms has two isoforms highly expressed, one isoform moderately expressed, and one isoform not expressed, then our method would call the two highly expressed isoforms as dominant. The percentage-based method

would in this case not detect any isoforms as dominant since the two highly expressed isoforms mask each other. Furthermore, if one of the highly expressed genes loses dominance in a certain sample while the moderately expressed isoform gains dominance, the ratio-based method would correctly detect an isoform switch, whereas the percentage-based method would still not register any dominant isoforms. For the ratio-based method, a ratio of 2.2 was chosen as a threshold for detection based on benchmarks (Supplemental Figure S2). Setting this threshold on the PM ratio only once would however result in false positives for genes with multiple unexpressed isoforms. If for example a gene with four isoforms has two lowly expressed isoforms with a PM value of 1 ( $U1$  and  $U2$ ), one moderately expressed isoform with a PM value of 20 ( $M$ ), and one highly expressed isoform with a PM value of 500 ( $H$ ), then  $M$  would falsely be called as dominant along with  $H$ . This results from using the median PM of  $U1$ ,  $U2$ , and  $H$  to calculate the PM ratio of  $M$  which would be equal to  $20/\text{median}(1, 1, 500) = 20$ , which exceeds the threshold of 2.2. To avoid these situations, an iterative approach was used where the PM ratios are recalculated and re-evaluated after removing non-dominant isoforms. In the example of the four isoforms this would result in the removal of  $U1$  and  $U2$  after the first iteration and the recalculation of the PM ratio of  $M$  as  $20/\text{median}(500)=0.04$  in the second iteration, which no longer exceeds the threshold. If no dominance can be found in the first iteration, all isoforms are classified as non-dominant. Transcripts with PM expression values lower than 5.0 are classified as non-dominant by default. A gene was said to be

expressed when any of its transcripts was given an PM value greater than or equal to 5.0 by at least two of the three quantification tools.

### **Detection and classification of isoform switches**

Based on the transcript-level dominance calls, isoform switches were detected for each gene with more than one transcript isoform. For this, an ‘isoform dominance configuration’ was defined as the set of isoforms that are detected as dominant for a gene in a given sample. The ‘favorite configuration’ of each gene was then defined as the most frequently occurring configuration in all 206 public samples or the 100 simulated samples. Any deviations from this configuration, by one or more isoforms losing or gaining dominance, was classified as an isoform switch, except when no dominant isoforms were found.

Isoform switches were classified based on the effect of the switch on the protein coding sequences (CDSs) and protein domain contents of the isoforms in the new configuration compared to the favorite configuration. For this, the set of unique CDSs of the dominant isoforms in each configuration was determined. Similarly the set of unique protein domain combinations in these coding sequences was extracted. When an isoform switch occurred and the new configuration had a changed set of CDSs or protein domain combinations compared to the favorite configuration, this switch was classified as ‘CDS altering’ or ‘domain altering’ respectively. Since a loss or gain of dominance for transcripts without a valid CDS does not change the set of CDSs of the configuration, switches involving only

these transcripts were not classified as CDS altering. Contrarily, a lack of known protein domains was still considered as a valid protein domain combination since this has functional consequences for the protein. Switches from or to a configuration where no dominant isoforms contained a valid CDS were separately classified as 'CDS toggling' switches. All other cases were classified as 'non-CDS altering'.

CDS data was obtained from AtRTD2 (Zhang et al., 2017). CDSs shorter than 300nt were discarded and isoforms resulting from intron retention events were not considered to contain valid CDSs. Protein domains were determined using InterProScan (v5.22-61, <https://github.com/ebi-pf-team/interproscan>). All domains from PfamA, TIGRFAM, PIRSF, ProDom, SMART, PrositeProfiles, PrositePatterns, PRINTS, SuperFamily, Coils, and Gene3d were searched, but only domains with a known InterPro identifier were used to determine domain altering switches. The CDSs and InterPro domains can be found in GTF format in Supplemental Data S4.

The full isoform switching compendium can be found in Supplemental Data S3. This file contains a matrix of all genes with two or more transcript isoforms (rows) and the 206 public RNA-Seq samples (columns). The matrix consists of seven possible integer values: -2 indicates no expression for the gene in this sample, -1 indicates that no dominant isoform was detected, 0 indicates that the favorite configuration of dominant isoforms is active, and 1, 2, 3, and 4 indicate non-CDS altering, CDS toggling, CDS altering, and domain altering switches respectively.



## **Hierarchical clustering of public RNA-Seq samples based on isoform switching**

The isoform switching compendium, containing isoform switching calls for every gene in each of the 206 public samples, was transformed to a binary matrix with only the integers '1' for an isoform switch and '0' for no isoform switch. Matthews correlation coefficients between the columns of this matrix were then used for hierarchical clustering of samples (wards method) with hclust from the stats R package (v3.0.2).

## **Gene set enrichment analyses and additional data**

Gene-GO annotations for all evidence types were downloaded from TAIR (Lamesch et al., 2012) and PLAZA 3.0 (Proost et al., 2015) on 24 January 2017. Data from both databases was concatenated and all parental terms were added. Homology data from PLAZA 3.0 Dicots was also used to divide genes into five phylostrata (Viridiplantae, Embryophyta, Angiosperms, Eudicots, and Brassicaceae) and to count the number of paralogs for Figure 6. Enrichment analyses were based on hypergeometric tests with Benjamini-Hochberg correction at FDR=0.05. Only GO and gene ages from genes that are expressed in five or more samples and have two or more isoforms were used as background for these tests. Protein-protein interactions (PPI) for Figure 6 were obtained by combining experimental data from CORNET 3.0 (Van Bel and Coppens, 2017) and a recent study using protein arrays (Yazaki et al., 2016).

## **ACKNOWLEDGMENTS**

This work was supported by the Agency for Innovation by Science and Technology (IWT) in Flanders (predoctoral fellowship to D.V.).

## SUPPORTING INFORMATION

**Supplemental Figure S1. Read number and length of public RNA-Seq datasets.** On Oktober 1st 2015, the Sequence Read Archive was queried for RNA-Seq experiments for *Arabidopsis thaliana*. 2799 experiments were found, grouped in 214. 395 Of these experiments contain exclusively paired-end sequenced runs, the other 2404 contain only single-end runs. The number of reads and their lengths are shown for single-end and paired-end experiments.

**Supplemental Figure S2. Benchmarking PM ratio and value thresholds.** The PM ratio threshold dictates when an isoform is called as dominant. The PM value threshold dictates when an isoform is considered to be expressed. Boxplots show F1 scores of isoform switch detection. Results are based on the simulated compendium of 30 million 100 nucleotide single-end reads. For the PM ratio threshold plot, a PM value threshold of 5 was used. For the PM value threshold plot, a PM ratio threshold of 2.2 was used.

**Supplemental Table S1. Metadata of 206 public RNA-Seq samples.** Short and detailed descriptions for the 206 public RNA-Seq samples.

**Supplemental Table S2. Simpson et al. RT-PCR validation.** PS and PSam values for the ten genes in three organs from Figure 3. For each gene, the isoform suffixes of isoforms with either the distal (dist), proximal (prox), or neither splice events are shown in columns 2-3 respectively.

**Supplemental Table S3. Gene set enrichment analyses for switch frequencies.** Gene set enrichment statistics are shown for Gene Ontology (GO) terms and phylostrata for non-, rare-, and frequent switchers. Hypergeometric tests were used to obtain p-values, which were corrected to q-values with the Benjamini-Hochberg method.

**Supplemental Data S1. Kallisto isoform expression values.** This CSV file contains the raw TPM values produced by Kallisto for all isoforms in AtRTD2 (rows) across the 206 public samples (columns).

**Supplemental Data S2. Isoform dominance compendium.** This CSV file contains the isoform dominance calls produced by the ensemble method. 0 and 1 indicate no dominance and dominance respectively for each isoform (rows) in each sample (columns).

**Supplemental Data S3. Isoform switching compendium.** This CSV file contains the isoform switching calls produced by the ensemble method. -2, -1, 0, 1, 2, 3, and 4 indicate no expression, no dominance, no isoform switch, a non-CDS altering switch, a CDS toggling switch, a CDS altering switch, and a domain altering switch respectively for each isoform (rows) in each sample (columns).

**Supplemental Data S4. AtRTD2 CDS and protein domains.** This GTF file contains the exons, CDS, and protein domains for each isoform in the AtRTD2 annotation.

## FIGURE LEGENDS

**Figure 1. Read properties influence the detection of isoform dominance and switching.** Three properties of reads were examined: the read number (per million), the read length (in nucleotides), and the read type (single-end and paired-end). Boxplots represent F1 scores per isoform for dominant isoform detection and per gene for isoform switch detection. Average recall and precision are marked by X and O respectively.

**Figure 2. Discriminative Mapping Area length correlates with dominant isoform detection performance.** Panel a illustrates the definition of the Discriminative Mapping Area (DMA) of a gene as its combined genomic areas that are only present in a subset of its isoforms. Panel b shows the correlated decline of the DMA length per isoform (in nucleotides) and the average F1 scores of dominant isoform detection for genes with an increasing number of annotated isoforms. DMA per isoform was calculated as the length of a gene's DMA divided by its number of isoforms. Error flags represent the 95% confidence intervals.

**Figure 3. Comparison of isoform dominance calls to RT-PCR Percent Spliced values.** On the left, RT-PCR Percent Spliced values from Simpson et al. are shown for distal and proximal splice events of 20 genes in root, leaf, and flower samples. On the right, the percentage of corresponding public RNA-Seq samples are shown in which either the distal, proximal, or no event was detected as dominant. Data shown here are available in Supplemental Table S2.

**Figure 4. Hierarchical clustering of public RNA-Seq samples based on isoform switching calls.** 206 Public RNA-Seq samples from the Sequence Read Archive were clustered based on isoform switching calls generated with the Ensemble method. Biological replicates are connected by red lines, samples from the same study are connected by blue lines. Samples marked by a black dot are from a single large-scale RNA-Seq study by Klepikova et al., 2016. Sample metadata regarding organ types and treatments are presented as illustrations. For each sample, the number of genes with a detected isoform switch and the type of the observed switches are shown in stacked barcharts. Detailed metadata for each sample can be found in Supplemental Table S1.

**Figure 5. Gene set enrichment analyses of genes with different isoform switching frequencies.** For each gene the switch frequency was calculated as the ratio of samples in which the gene switches isoforms over samples in which the gene is expressed. Panel a shows a density plot of switch frequencies of genes with isoform switches. Panel b shows log<sub>2</sub> enrichment folds for a selection of Gene Ontology terms and gene phylostrata for genes with different switch frequencies. Negative values indicate depletions. Asterisks indicate enrichments or depletions that were significant according to a hypergeometric test with FDR controlled at 0.05. Full enrichment results can be found in Supplemental Table S3.

**Figure 6. Gene properties influence types of isoform switching.** Genes were binned based on a series of properties: (i) the frequency at which they switch isoforms, (ii) the number of annotated isoforms, (iii) the number of exons, (iv) the

expression breadth as the number of samples the gene was expressed in, (v) the number of Protein-Protein Interaction (PPI) partners, (vi) the phylostratum of the gene, and (vii) the number of paralogs the gene has in *Arabidopsis thaliana*.

**Figure 7. Examples of genes with condition-specific isoform switching.** For each gene, the structure of the involved isoforms and their encoded protein domains are shown. Line plots represent expression levels of the isoforms as a percentage of the total gene expression (y-axis, TPM values from Kallisto were used) across a selection of samples from the public dataset (x-axis).

## REFERENCES

- Andrews S** (2010) FastQC: A quality control tool for high throughput sequence data. *In*. Babraham Bioinformatics, <http://www.bioinformatics.bbsrc.ac.uk/projects/fastqc/>
- Bray NL, Pimentel H, Melsted P, Pachter L** (2016) Near-optimal probabilistic RNA-seq quantification. *Nat Biotech* **34**: 525-527
- Brown JW, Simpson CG, Marquez Y, Gadd GM, Barta A, Kalyna M** (2015) Lost in Translation: Pitfalls in Deciphering Plant Alternative Splicing Transcripts. *Plant Cell* **27**: 2083-2087
- Carrie C, Murcha MW, Millar AH, Smith SM, Whelan J** (2007) Nine 3-ketoacyl-CoA thiolases (KATs) and acetoacetyl-CoA thiolases (ACATs) encoded by five genes in *Arabidopsis thaliana* are targeted either to peroxisomes or cytosol but not to mitochondria. *Plant Mol Biol* **63**: 97-108
- Carvalho RF, Feijao CV, Duque P** (2013) On the physiological significance of alternative splicing events in higher plants. *Protoplasma* **250**: 639-650
- Chamala S, Feng G, Chavarro C, Barbazuk WB** (2015) Genome-wide identification of evolutionarily conserved alternative splicing events in flowering plants. *Front Bioeng Biotechnol* **3**: 33
- Cheng CY, Krishnakumar V, Chan A, Thibaud-Nissen F, Schobel S, Town CD** (2016) Araport11: a complete reannotation of the *Arabidopsis thaliana* reference genome. *Plant J*
- Dobin A, Davis CA, Schlesinger F, Drenkow J, Zaleski C, Jha S, Batut P, Chaisson M, Gingeras TR** (2013) STAR: ultrafast universal RNA-seq aligner. *Bioinformatics* **29**: 15-21
- Engstrom PG, Steijger T, Sipos B, Grant GR, Kahles A, Ratsch G, Goldman N, Hubbard TJ, Harrow J, Guigo R, Bertone P, Consortium R** (2013) Systematic evaluation of spliced alignment programs for RNA-seq data. *Nat Methods* **10**: 1185-1191
- Erkelenz S, Mueller WF, Evans MS, Busch A, Schoneweis K, Hertel KJ, Schaal H** (2013) Position-dependent splicing activation and repression by SR and hnRNP proteins rely on common mechanisms. *RNA* **19**: 96-102
- Fang SC, Fernandez DE** (2002) Effect of regulated overexpression of the MADS domain factor AGL15 on flower senescence and fruit maturation. *Plant Physiol* **130**: 78-89
- Filichkin S, Priest HD, Megraw M, Mockler TC** (2015) Alternative splicing in plants: directing traffic at the crossroads of adaptation and environmental stress. *Curr Opin Plant Biol* **24**: 125-135



- Gene Ontology C** (2015) Gene Ontology Consortium: going forward. *Nucleic Acids Res* **43**: D1049-1056
- Gohring J, Jacak J, Barta A** (2014) Imaging of endogenous messenger RNA splice variants in living cells reveals nuclear retention of transcripts inaccessible to nonsense-mediated decay in Arabidopsis. *Plant Cell* **26**: 754-764
- Gonzalez-Porta M, Frankish A, Rung J, Harrow J, Brazma A** (2013) Transcriptome analysis of human tissues and cell lines reveals one dominant transcript per gene. *Genome Biol* **14**: R70
- Gordon A** (2009) FastX Toolkit. *In*. Hannon Lab, [http://hannonlab.cshl.edu/fastx\\_toolkit/](http://hannonlab.cshl.edu/fastx_toolkit/)
- Griebel T, Zacher B, Ribeca P, Raineri E, Lacroix V, Guigo R, Sammeth M** (2012) Modelling and simulating generic RNA-Seq experiments with the flux simulator. *Nucleic Acids Res* **40**: 10073-10083
- Hobert O** (2008) Gene regulation by transcription factors and microRNAs. *Science* **319**: 1785-1786
- Hughes TA** (2006) Regulation of gene expression by alternative untranslated regions. *Trends Genet* **22**: 119-122
- Iniguez LP, Hernandez G** (2017) The Evolutionary Relationship between Alternative Splicing and Gene Duplication. *Front Genet* **8**: 14
- Kalyana M, Simpson CG, Syed NH, Lewandowska D, Marquez Y, Kusenda B, Marshall J, Fuller J, Cardle L, McNicol J, Dinh HQ, Barta A, Brown JW** (2012) Alternative splicing and nonsense-mediated decay modulate expression of important regulatory genes in Arabidopsis. *Nucleic Acids Res* **40**: 2454-2469
- Kelemen O, Convertini P, Zhang Z, Wen Y, Shen M, Falaleeva M, Stamm S** (2013) Function of alternative splicing. *Gene* **514**: 1-30
- Kim E, Magen A, Ast G** (2007) Different levels of alternative splicing among eukaryotes. *Nucleic Acids Res* **35**: 125-131
- Klepikova AV, Kasianov AS, Gerasimov ES, Logacheva MD, Penin AA** (2016) A high resolution map of the Arabidopsis thaliana developmental transcriptome based on RNA-seq profiling. *Plant J* **88**: 1058-1070
- Kodama Y, Shumway M, Leinonen R, International Nucleotide Sequence Database C** (2012) The Sequence Read Archive: explosive growth of sequencing data. *Nucleic Acids Res* **40**: D54-56
- Krishnakumar V, Hanlon MR, Contrino S, Ferlanti ES, Karamycheva S, Kim M, Rosen BD, Cheng CY, Moreira W, Mock SA, Stubbs J, Sullivan JM, Krampis K, Miller JR, Micklem G, Vaughn M, Town CD** (2015) Araport: the Arabidopsis information portal. *Nucleic Acids Res* **43**: D1003-1009

- Lamesch P, Berardini TZ, Li D, Swarbreck D, Wilks C, Sasidharan R, Muller R, Dreher K, Alexander DL, Garcia-Hernandez M, Karthikeyan AS, Lee CH, Nelson WD, Ploetz L, Singh S, Wensel A, Huala E** (2012) The Arabidopsis Information Resource (TAIR): improved gene annotation and new tools. *Nucleic Acids Res* **40**: D1202-1210
- Li B, Ruotti V, Stewart RM, Thomson JA, Dewey CN** (2010) RNA-Seq gene expression estimation with read mapping uncertainty. *Bioinformatics* **26**: 493-500
- Li E** (2002) Chromatin modification and epigenetic reprogramming in mammalian development. *Nat Rev Genet* **3**: 662-673
- Li H, Handsaker B, Wysoker A, Fennell T, Ruan J, Homer N, Marth G, Abecasis G, Durbin R, Genome Project Data Processing S** (2009) The Sequence Alignment/Map format and SAMtools. *Bioinformatics* **25**: 2078-2079
- Lin H, Ouyang S, Egan A, Nobuta K, Haas BJ, Zhu W, Gu X, Silva JC, Meyers BC, Buell CR** (2008) Characterization of paralogous protein families in rice. *BMC Plant Biol* **8**: 18
- Marquez Y, Brown JW, Simpson C, Barta A, Kalyna M** (2012) Transcriptome survey reveals increased complexity of the alternative splicing landscape in Arabidopsis. *Genome Res* **22**: 1184-1195
- Moreau F, Thevenon E, Blanvillain R, Lopez-Vidriero I, Franco-Zorrilla JM, Dumas R, Parcy F, Morel P, Trehin C, Carles CC** (2016) The Myb-domain protein ULTRAPETALA1 INTERACTING FACTOR 1 controls floral meristem activities in Arabidopsis. *Development* **143**: 1108-1119
- Mortazavi A, Williams BA, McCue K, Schaeffer L, Wold B** (2008) Mapping and quantifying mammalian transcriptomes by RNA-Seq. *Nat Methods* **5**: 621-628
- Pan Q, Shai O, Lee LJ, Frey BJ, Blencowe BJ** (2008) Deep surveying of alternative splicing complexity in the human transcriptome by high-throughput sequencing. *Nat Genet* **40**: 1413-1415
- Patro R, Duggal G, Kingsford C** (2015) Salmon: Accurate, Versatile and Ultrafast Quantification from RNA-seq Data using Lightweight-Alignment. *bioRxiv*
- Pertea M, Mount SM, Salzberg SL** (2007) A computational survey of candidate exonic splicing enhancer motifs in the model plant Arabidopsis thaliana. *BMC Bioinformatics* **8**: 159
- Proost S, Van Bel M, Vanechoutte D, Van de Peer Y, Inze D, Mueller-Roeber B, Vandepoele K** (2015) PLAZA 3.0: an access point for plant comparative genomics. *Nucleic Acids Research* **43**: D974-D981

- Reddy AS, Marquez Y, Kalyna M, Barta A** (2013) Complexity of the alternative splicing landscape in plants. *Plant Cell* **25**: 3657-3683
- Roux J, Robinson-Rechavi M** (2011) Age-dependent gain of alternative splice forms and biased duplication explain the relation between splicing and duplication. *Genome Res* **21**: 357-363
- Seo PJ, Kim MJ, Ryu JY, Jeong EY, Park CM** (2011) Two splice variants of the IDD14 transcription factor competitively form nonfunctional heterodimers which may regulate starch metabolism. *Nat Commun* **2**: 303
- Simpson CG, Fuller J, Maronova M, Kalyna M, Davidson D, McNicol J, Barta A, Brown JW** (2008) Monitoring changes in alternative precursor messenger RNA splicing in multiple gene transcripts. *Plant J* **53**: 1035-1048
- Staiger D, Brown JW** (2013) Alternative splicing at the intersection of biological timing, development, and stress responses. *Plant Cell* **25**: 3640-3656
- Sun X, Yang Q, Deng Z, Ye X** (2014) Digital inventory of Arabidopsis transcripts revealed by 61 RNA sequencing samples. *Plant Physiol* **166**: 869-878
- Thatcher SR, Danilevskaya ON, Meng X, Beatty M, Zastrow-Hayes G, Harris C, Van Allen B, Habben J, Li B** (2016) Genome-Wide Analysis of Alternative Splicing during Development and Drought Stress in Maize. *Plant Physiol* **170**: 586-599
- Trapnell C, Williams BA, Pertea G, Mortazavi A, Kwan G, van Baren MJ, Salzberg SL, Wold BJ, Pachter L** (2010) Transcript assembly and quantification by RNA-Seq reveals unannotated transcripts and isoform switching during cell differentiation. *Nat Biotechnol* **28**: 511-515
- Van Bel M, Coppens F** (2017) Exploring Plant Co-Expression and Gene-Gene Interactions with CORNET 3.0. *Methods Mol Biol* **1533**: 201-212
- Vitulo N, Forcato C, Carpinelli EC, Telatin A, Campagna D, D'Angelo M, Zimbello R, Corso M, Vannozzi A, Bonghi C, Lucchin M, Valle G** (2014) A deep survey of alternative splicing in grape reveals changes in the splicing machinery related to tissue, stress condition and genotype. *BMC Plant Biol* **14**: 99
- Wang BB, Brendel V** (2006) Genomewide comparative analysis of alternative splicing in plants. *Proceedings of the National Academy of Sciences of the United States of America* **103**: 7175-7180
- Wiszniewski AA, Bussell JD, Long RL, Smith SM** (2014) Knockout of the two evolutionarily conserved peroxisomal 3-ketoacyl-CoA thiolases in Arabidopsis recapitulates the abnormal inflorescence meristem 1 phenotype. *J Exp Bot* **65**: 6723-6733
- Wiszniewski AA, Smith SM, Bussell JD** (2012) Conservation of two lineages of peroxisomal (Type I) 3-ketoacyl-CoA thiolases in land plants, specialization

of the genes in Brassicaceae, and characterization of their expression in *Arabidopsis thaliana*. *J Exp Bot* **63**: 6093-6103

- Yazaki J, Galli M, Kim AY, Nito K, Aleman F, Chang KN, Carvunis AR, Quan R, Nguyen H, Song L, Alvarez JM, Huang SS, Chen H, Ramachandran N, Altmann S, Gutierrez RA, Hill DE, Schroeder JI, Chory J, LaBaer J, Vidal M, Braun P, Ecker JR** (2016) Mapping transcription factor interactome networks using HaloTag protein arrays. *Proc Natl Acad Sci U S A* **113**: E4238-4247
- Zhang R, Calixto CP, Marquez Y, Venhuizen P, Tzioutziou NA, Guo W, Spensley M, Entizne JC, Lewandowska D, Ten Have S, Frei Dit Frey N, Hirt H, James AB, Nimmo HG, Barta A, Kalyna M, Brown JW** (2017) A high quality *Arabidopsis* transcriptome for accurate transcript-level analysis of alternative splicing. *Nucleic Acids Res*
- Zhang R, Calixto CP, Tzioutziou NA, James AB, Simpson CG, Guo W, Marquez Y, Kalyna M, Patro R, Eyraas E, Barta A, Nimmo HG, Brown JW** (2015) AtRTD - a comprehensive reference transcript dataset resource for accurate quantification of transcript-specific expression in *Arabidopsis thaliana*. *New Phytol* **208**: 96-101
- Zheng Q, Zheng Y, Ji H, Burnie W, Perry SE** (2016) Gene Regulation by the AGL15 Transcription Factor Reveals Hormone Interactions in Somatic Embryogenesis. *Plant Physiol* **172**: 2374-2387
- Zheng Y, Ren N, Wang H, Stromberg AJ, Perry SE** (2009) Global identification of targets of the *Arabidopsis* MADS domain protein AGAMOUS-Like15. *Plant Cell* **21**: 2563-2577

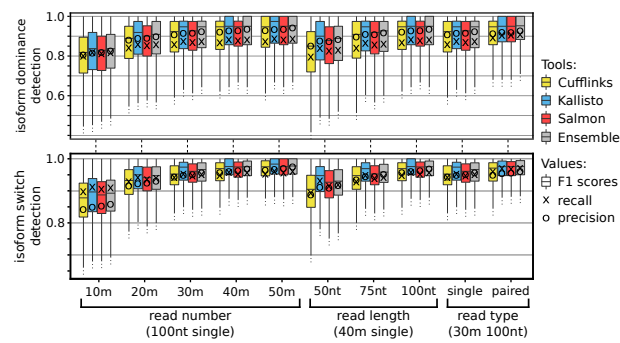

**Figure 1. Read properties influence the detection of isoform dominance and switching.** Three properties of reads were examined: the read number (per million), the read length (in nucleotides), and the read type (single-end and paired-end). Boxplots represent F1 scores per isoform for dominant isoform detection and per gene for isoform switch detection. Average recall and precision are marked by X and O respectively. Boxplot outliers are not shown.

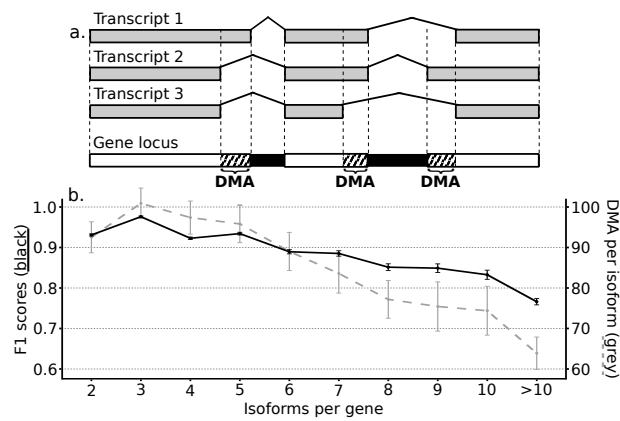

**Figure 2. Discriminative Mapping Area length correlates with dominant isoform detection performance.** Panel a illustrates the definition of the Discriminative Mapping Area (DMA) of a gene as its combined genomic areas that are only present in a subset of its isoforms. Panel b shows the correlated decline of the DMA length per isoform (in nucleotides) and the average F1 scores of dominant isoform detection for genes with an increasing number of annotated isoforms. DMA per isoform was calculated as the length of a gene's DMA divided by its number of isoforms. Error flags represent the 95% confidence intervals.

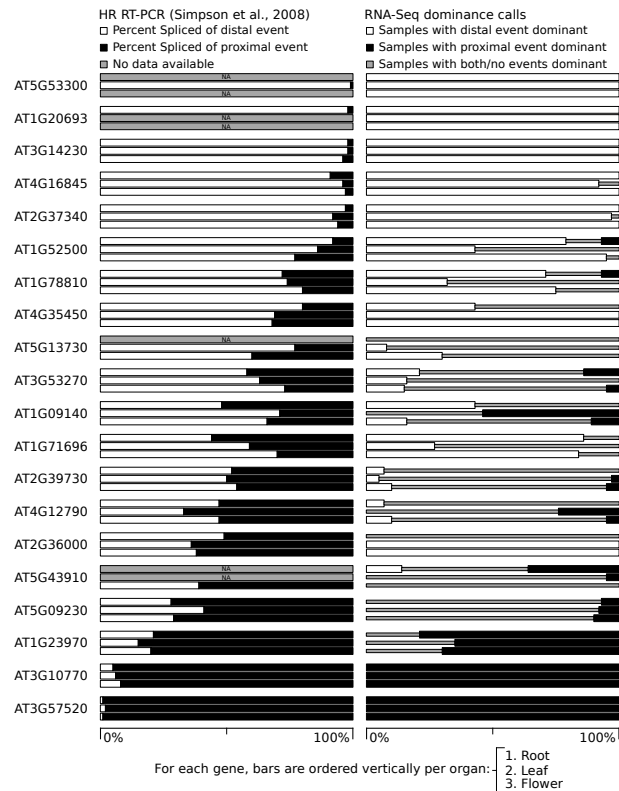

**Figure 7. Comparison of isoform dominance calls to RT-PCR Percent Spliced values.** On the left, RT-PCR Percent Spliced values from Simpson et al., 2008 are shown for distal and proximal splice events of 20 genes in root, leaf, and flower samples. On the right, the percentage of corresponding public RNA-Seq samples are shown in which either the distal, proximal, or no event was detected as dominant. Data shown here are available in Supplemental Table S2.

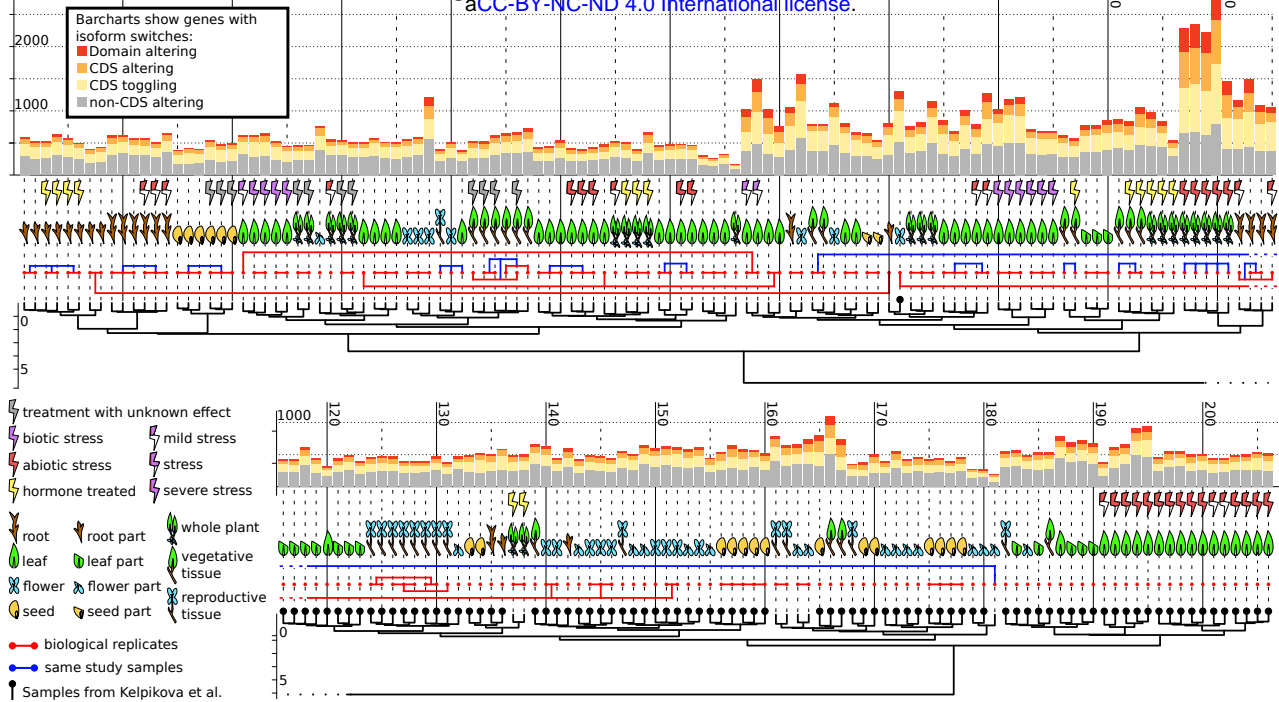

**Figure 4. Hierarchical clustering of public RNA-Seq samples based on isoform switching calls.** 206 Public RNA-Seq samples from the Sequence Read Archive were clustered based on isoform switching calls generated with the Ensemble method. Biological replicates are connected by red lines, samples from the same study are connected by blue lines. Samples marked by a black dot are from a single large-scale RNA-Seq study by Kelpikova et al., 2016. Sample metadata regarding organ types and treatments are presented as illustrations. For each sample, the number of genes with a detected isoform switch and the type of the observed switches are shown in stacked barcharts. Detailed metadata for each sample can be found in Supplemental Table S1.



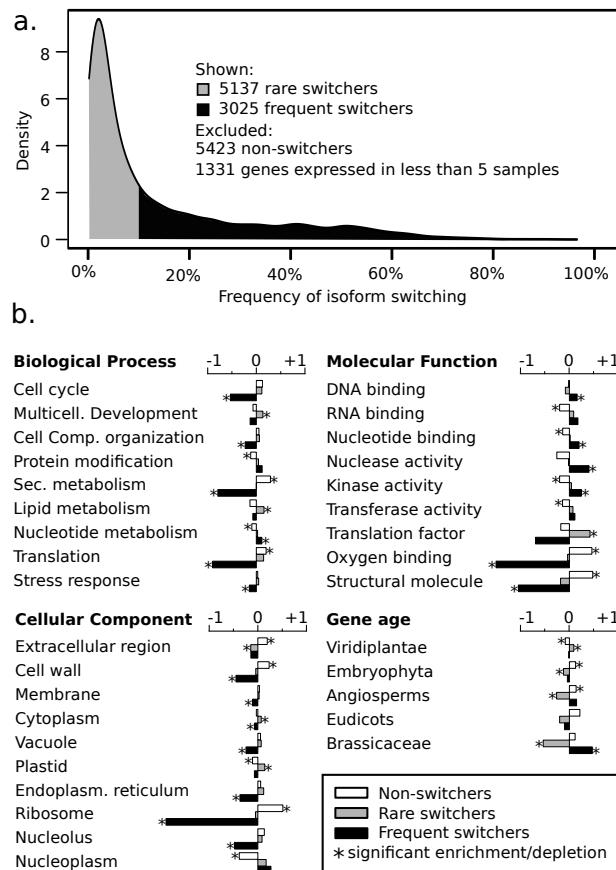

**Figure 5. Gene set enrichment analyses of genes with different isoform switching frequencies.** For each gene the switch frequency was calculated as the ratio of samples in which the gene switches isoforms over samples in which the gene is expressed. Panel a shows a density plot of switch frequencies of genes with isoform switches. Panel b shows log<sub>2</sub> enrichment folds for a selection of Gene Ontology terms and gene phylostrata for genes with different switch frequencies. Negative values indicate depletions. Asterisks indicate enrichments or depletions that were significant according to a hypergeometric test with FDR controlled at 0.05. Full enrichment results can be found in Supplemental Table S3.

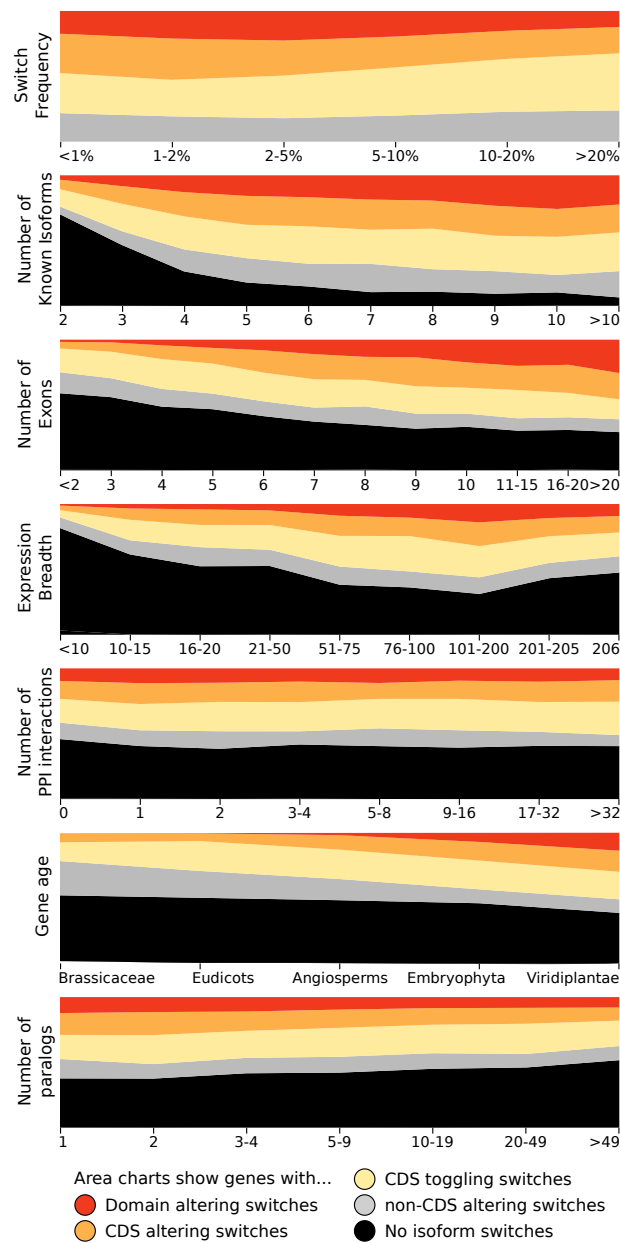

**Figure 6. Gene properties influence types of isoform switching.** Genes were binned based on a series of properties: (i) the frequency at which they switch isoforms, (ii) the number of annotated isoforms, (iii) the number of exons, (iv) the expression breadth as the number of samples the gene was expressed in, (v) the number of Protein-Protein Interaction (PPI) partners, (vi) the phylostratum of the gene, and (vii) the number of paralogs the gene has in *Arabidopsis thaliana*.

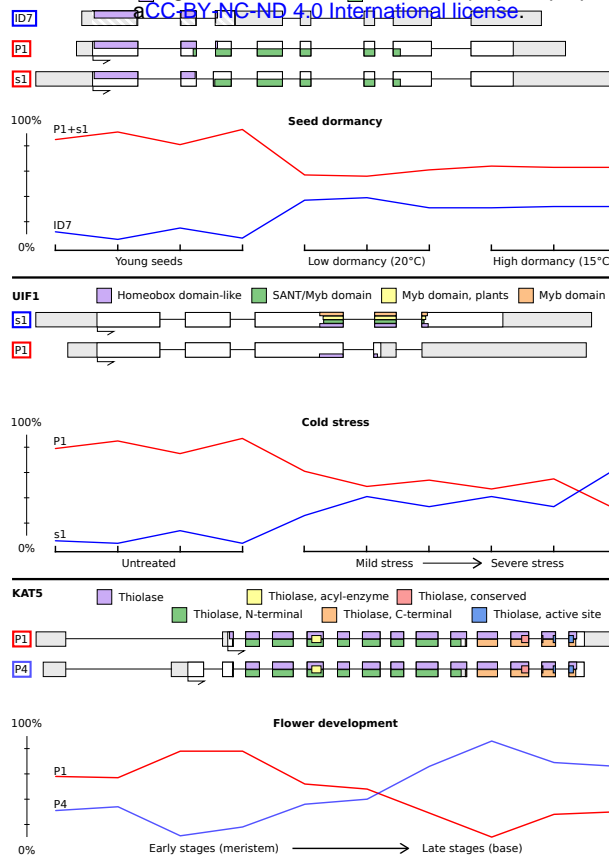

**Figure 7. Examples of genes with condition-specific isoform switching.** For each gene, the structure of the involved isoforms and their encoded protein domains are shown. UTR and CDS are shown in grey and white respectively. Line plots represent expression levels of the isoforms as a percentage of the total gene expression (y-axis, TPM values from Kallisto were used) across a selection of samples from the public dataset (x-axis).
